# Supplementary material for: Alcohol Prevention in Urgent and Emergency Care (APUEC): Development and Evaluation of Workforce Digital Training on Screening, Brief Intervention, and Referral for Treatment
Source: MDPI journal article supplement (doi:10.3390/ijerph20227028), 2023-11-07
Supplement: s1 [file s1]

## Reusable Learning Object Peer Review (1) – Specification

### About the Resource

|               |                                                        |
|---------------|--------------------------------------------------------|
| <b>Title</b>  | <input type="text" value="Click here to enter text."/> |
| <b>RLO ID</b> | <input type="text" value="enter"/>                     |
| <b>Author</b> | <input type="text" value="Click here to enter text."/> |
| <b>Email</b>  | <input type="text" value="Click here to enter text."/> |
| <b>Phone</b>  | <input type="text" value="Click here to enter text."/> |

### About the Review

|                           |                                                        |
|---------------------------|--------------------------------------------------------|
| <b>Reviewer</b>           | <input type="text" value="Click here to enter text."/> |
| <b>Date Requested</b>     | <input type="text" value="Click here to enter text."/> |
| <b>Please complete by</b> | <input type="text" value="Click here to enter text."/> |
| <b>Please return to</b>   | <input type="text" value="Click here to enter text."/> |
| <b>Email</b>              | <input type="text" value="Click here to enter text."/> |

### Your Review

**Reviewers**, please read through the specification sheet and any additional materials supplied, then complete the 10 questions contained within this form. Wherever possible, please contact the author to discuss your comments and suggest revisions. If necessary, continue on additional sheets and label these with the RLO ID number.

**Authors**, on receiving the reviewers' comments, please complete the "Author's revision" boxes on the form. You may wish to submit a revised specification and then cross reference the changes onto this form.

## Supplementary File S3: Stage 1 Peer Review of Content

### 1) Learning Objective

Is the learning objective clear and do all sections of the resource support it?

Fully ☐ Mostly ☐ Partially ☐ Minimally ☐

Please outline any revisions you would suggest

Click or tap here to enter text.

Author's Revisions

Click or tap here to enter text.

### 2) Content

Is the content factually correct?

Fully ☐ Mostly ☐ Partially ☐ Minimally ☐

Please outline any revisions you would suggest

Click or tap here to enter text.

Author's Revisions

Click or tap here to enter text.

### 3) Text

Is the text written in short, clear sentences suitable for narration?

Fully ☐ Mostly ☐ Partially ☐ Minimally ☐

Please outline any revisions you would suggest

Click or tap here to enter text.

Author's Revisions

Click or tap here to enter text.

### 4) Visual Elements

Are the suggestions/examples for images/animations/video appropriate?

Fully ☐ Mostly ☐ Partially ☐ Minimally ☐

Please outline any revisions you would suggest

Click or tap here to enter text.

Author's Revisions

Click or tap here to enter text.
