# Supplementary material for: Alcohol Prevention in Urgent and Emergency Care (APUEC): Development and Evaluation of Workforce Digital Training on Screening, Brief Intervention, and Referral for Treatment
Source: MDPI journal article supplement (doi:10.3390/ijerph20227028), 2023-11-07
Supplement: s1 [file s1]

**Supplementary File S2.** Mapping of design principles to RLO design feature.

| Design Principle    | Learning Approach for the RLO                                                                                          |
|---------------------|------------------------------------------------------------------------------------------------------------------------|
| Multimedia          | Combination of words, video, and images.                                                                               |
| Segmenting          | Eleven learner-paced segments (rather than a continuous unit).                                                         |
| Pre-training        | Learning outcomes provided, menu provides names of the key concepts.                                                   |
| Modality            | Contains animation and narration (in addition to on-screen text).                                                      |
| Coherence           | Exclusion of extraneous words, pictures, and sounds through colours, boxes, and moving materials to further resources. |
| Redundancy          | Removal of superfluous on-screen text. Inclusion of slides with visuals and audio only.                                |
| Signalling          | Use of a menu, navigation buttons, and section numbering.                                                              |
| Spatial contiguity  | Ensuring proximity of related words and images.                                                                        |
| Temporal contiguity | Ensuring related words and images appear at the same time.                                                             |
| Personalisation     | Text is presented in the active voice (conversational style).                                                          |
| Voice               | Human narration of text content.                                                                                       |

Reproduced (with permission) from: Blake, H.; Fecowycz, A.; Starbuck, H.; Jones, W. COVID-19 Vaccine Education (CoVE) for Health and Care Workers to Facilitate Global Promotion of the COVID-19 Vaccines. *Int. J. Environ. Res. Public Health* **2022**, *19*, 653. <https://doi.org/10.3390/ijerph19020653>
