# Supplementary material for: Alcohol Prevention in Urgent and Emergency Care (APUEC): Development and Evaluation of Workforce Digital Training on Screening, Brief Intervention, and Referral for Treatment
Source: MDPI journal article supplement (doi:10.3390/ijerph20227028), 2023-11-07
Supplement: s1 [file s1]

## Reusable Learning Object Peer Review (2) – Media

### About the Resource

|                  |                                                          |
|------------------|----------------------------------------------------------|
| <b>Title</b>     | Alcohol Prevention in Urgent and Emergency Care Settings |
| <b>URL:</b>      | Click here to enter text.                                |
| <b>RLO ID</b>    | enter                                                    |
| <b>Author</b>    | Click here to enter text.                                |
| <b>Email</b>     | Click here to enter text.                                |
| <b>Developer</b> | Click here to enter text.                                |
| <b>Email</b>     | Click here to enter text.                                |
| <b>Email</b>     | Click here to enter text.                                |
| <b>Phone</b>     | Click here to enter text.                                |

### About the Review

|                           |                           |
|---------------------------|---------------------------|
| <b>Reviewer</b>           | Click here to enter text. |
| <b>Date Requested</b>     | Click here to enter text. |
| <b>Please complete by</b> | Click here to enter text. |
| <b>Please return to</b>   | Click here to enter text. |
| <b>Email</b>              |                           |

### Your Review

**Reviewers:** Please work through the RLO at the URL address above. Then complete the relevant sections of this form. You may wish to discuss the feedback with the author. Please indicate below whether this discussion has occurred.

**Authors,** on receiving the reviewers' comments, please complete the "Author's revision" boxes on the form. You should discuss these with the RLO developer and the mentor before proceeding.

### 1) General

|                                                                              |                          |                                                                       |
|------------------------------------------------------------------------------|--------------------------|-----------------------------------------------------------------------|
| Is the general look and feel of the RLO coherent and conducive for learning? |                          |                                                                       |
| Fully                                                                        | <input type="checkbox"/> | Partially <input type="checkbox"/> Minimally <input type="checkbox"/> |
| Please outline any revisions you would suggest                               |                          |                                                                       |
| Click or tap here to enter text.                                             |                          |                                                                       |
| Author's Revisions                                                           |                          |                                                                       |
| Click or tap here to enter text.                                             |                          |                                                                       |

### 2) Duration

|                                                                                  |                           |
|----------------------------------------------------------------------------------|---------------------------|
| Estimate how long would it take students to complete this RLO in your estimation |                           |
| Minutes:                                                                         | Click here to enter text. |
| Please outline any revisions you would suggest                                   |                           |
| Click or tap here to enter text.                                                 |                           |
| Author's Revisions                                                               |                           |
| Click or tap here to enter text.                                                 |                           |

### 3) Narration

|                                                |                          |                                                                       |
|------------------------------------------------|--------------------------|-----------------------------------------------------------------------|
| Is the narration clear, audible and engaging?  |                          |                                                                       |
| Fully                                          | <input type="checkbox"/> | Partially <input type="checkbox"/> Minimally <input type="checkbox"/> |
| Please outline any revisions you would suggest |                          |                                                                       |
| Click or tap here to enter text                |                          |                                                                       |
| Author's Revisions                             |                          |                                                                       |
| Click or tap here to enter text.               |                          |                                                                       |

### 4) Visual Elements

|                                                                                                    |                          |                                                                       |
|----------------------------------------------------------------------------------------------------|--------------------------|-----------------------------------------------------------------------|
| Do the images, videos, animations, diagrams, photographs etc support the learning of this subject? |                          |                                                                       |
| Fully                                                                                              | <input type="checkbox"/> | Partially <input type="checkbox"/> Minimally <input type="checkbox"/> |
| Please outline any revisions you would suggest                                                     |                          |                                                                       |
| Click or tap here to enter text.                                                                   |                          |                                                                       |
| Author's Revisions                                                                                 |                          |                                                                       |
| Click or tap here to enter text.                                                                   |                          |                                                                       |
