# Supplementary material for: Alcohol Prevention in Urgent and Emergency Care (APUEC): Development and Evaluation of Workforce Digital Training on Screening, Brief Intervention, and Referral for Treatment
Source: MDPI journal article supplement (doi:10.3390/ijerph20227028), 2023-11-07
Supplement: s1 [file s1]

## Supplementary File S5. Evaluation survey items

---

1.To what extent do you agree with the following statements?

Please don't select more than 1 answer(s) per row.

1. I believe patients should be screened for their alcohol consumption in urgent and emergency care settings  
Strongly Disagree  
Disagree  
Neither Agree Nor Disagree  
Agree  
Strongly Agree
2. I believe that urgent and emergency care settings are suitable places to deliver brief interventions for alcohol prevention  
Strongly Disagree  
Disagree  
Neither Agree Nor Disagree  
Agree  
Strongly Agree
3. I believe that brief advice from a healthcare professional can help patients to reduce their drinking and/or seek help with their drinking  
Strongly Disagree  
Disagree  
Neither Agree Nor Disagree  
Agree  
Strongly Agree
4. I believe some patients should be referred for treatment for their alcohol consumption in urgent and emergency care settings  
Strongly Disagree  
Disagree  
Neither Agree Nor Disagree  
Agree  
Strongly Agree
5. I have the knowledge to screen my patients for alcohol consumption  
Strongly Disagree  
Disagree  
Neither Agree Nor Disagree  
Agree  
Strongly Agree
6. I know what tools to use to screen my patients for alcohol consumption  
Strongly Disagree  
Disagree  
Neither Agree Nor Disagree  
Agree  
Strongly Agree
7. I feel confident I can screen my patients for alcohol consumption  
Strongly Disagree  
Disagree

- Neither Agree Nor Disagree  
Agree  
Strongly Agree
8. I have the knowledge to give brief advice to my patients about reducing their alcohol consumption  
Strongly Disagree  
Disagree  
Neither Agree Nor Disagree  
Agree  
Strongly Agree
9. I feel confident that I can give brief advice to my patients about reducing their alcohol consumption  
Strongly Disagree  
Disagree  
Neither Agree Nor Disagree  
Agree  
Strongly Agree
10. I have the skills to give brief advice about alcohol with my patients  
Strongly Disagree  
Disagree  
Neither Agree Nor Disagree  
Agree  
Strongly Agree
11. I intend to increase the number of patients I screen for alcohol consumption  
Strongly Disagree  
Disagree  
Neither Agree Nor Disagree  
Agree  
Strongly Agree
12. I intend to increase the number of patients I give brief advice to about their alcohol consumption  
Strongly Disagree  
Disagree  
Neither Agree Nor Disagree  
Agree  
Strongly Agree
2. How helpful has the resource been for learning this subject? *Required*  
Very Helpful  
Helpful  
Unhelpful  
Very unhelpful
3. What was your main reason for using this resource? *Required*
4. Were you using this RLO to learn/support learning as a: *Required*  
HE student  
School student  
Tutor/Teacher/Lecturer

- Healthcare professional  
Patient/Service-user/Carer  
Other
5. How did you find out about this resource? *Required*  
It was a course learning resource  
Recommended by a colleague/peer  
Through HELM-Open  
Through Open Educational Resource (OER) catalogues  
General internet search  
Other
6. Did you experience any of these problems in using this resource?  
No problems experienced  
Technical (please specify)  
Level of difficulty/study (please specify)  
Language (please specify)  
Contextual/cultural differences (please specify)  
Other  
*b. Please specify problem/s experienced:*
7. Would you recommend it to others? *Required*  
Yes  
No
8. What did you most like about this resource? *Required*
9. What did you least like about this resource? *Required*
10. In order to help us track the use of this resource, please let us know which institution or organisation you are from. *Required*

**If you would be willing to give more feedback on this resource, please fill in your details below:**

The University processes your personal data in order to inform our research on the reuse of open educational resources in healthcare education. The legal basis for this processing is Article 6(1e) of the General Data Protection Regulations "processing is necessary for the performance of a task carried out in the public interest".

Details such as how to contact the University's Data Protection Officer and your rights as a data subject can be found at <https://www.nottingham.ac.uk/utilities/privacy/privacy.aspx>.

Further details on how your information is processed and how to find out when it will be disposed of can be found at <https://www.nottingham.ac.uk/utilities/privacy/privacy-information-for-research-participants.aspx>.

11. Name: *Optional*

12. E-mail address: *Optional*
